# Supplementary material for: Association between Protein Intake and the Risk of Hypertension among Chinese Men and Women: A Longitudinal Study
Source: MDPI journal article supplement (doi:10.3390/nu14061276), 2022-03-17
Supplement: s1 [file s1]

## Supplementary materials

**Table S1.** Associations between hypertension risk and cumulative average dietary intakes of red meat and white meat protein in Chinese men and women<sup>1</sup>

|                                     | Quintiles of intake in men |                  |                  |                  |                  | p for trend | Quintiles of intake in women |                  |                  |                  |                  | p for trend |
|-------------------------------------|----------------------------|------------------|------------------|------------------|------------------|-------------|------------------------------|------------------|------------------|------------------|------------------|-------------|
|                                     | 1                          | 2                | 3                | 4                | 5                |             | 1                            | 2                | 3                | 4                | 5                |             |
| Red meat protein                    |                            |                  |                  |                  |                  |             |                              |                  |                  |                  |                  |             |
| Number of participants              | 1401                       | 1401             | 1402             | 1401             | 1402             |             | 1550                         | 1550             | 1551             | 1550             | 1551             |             |
| Median intake (g/day)               | 0                          | 5.0              | 10.0             | 15.7             | 25.6             |             | 0                            | 4.0              | 8.2              | 13.2             | 21.2             |             |
| Cases/person-years                  | 653/12960                  | 535/15293        | 494/14635        | 494/14047        | 410/11518        |             | 669/13432                    | 509/16801        | 455/15629        | 404/15945        | 339/12775        |             |
| Model 1                             | 1 (ref)                    | 0.71(0.63, 0.80) | 0.68(0.61, 0.77) | 0.74(0.66, 0.84) | 0.75(0.66, 0.85) | 0.0003      | 1 (ref)                      | 0.64(0.57, 0.72) | 0.58(0.51, 0.65) | 0.51(0.45, 0.58) | 0.59(0.52, 0.67) | <.0001      |
| Model 2                             | 1 (ref)                    | 0.71(0.63, 0.79) | 0.64(0.56, 0.72) | 0.68(0.60, 0.78) | 0.68(0.59, 0.78) | <.0001      | 1 (ref)                      | 0.67(0.60, 0.75) | 0.58(0.51, 0.66) | 0.51(0.45, 0.58) | 0.58(0.50, 0.68) | <.0001      |
| Model 3                             | 1 (ref)                    | 0.77(0.68, 0.87) | 0.76(0.65, 0.87) | 0.85(0.72, 0.99) | 0.85(0.71, 1.02) | 0.863       | 1 (ref)                      | 0.75(0.67, 0.85) | 0.70(0.61, 0.82) | 0.66(0.56, 0.78) | 0.78(0.64, 0.93) | 0.044       |
| White meat protein                  |                            |                  |                  |                  |                  |             |                              |                  |                  |                  |                  |             |
| Number of participants <sup>2</sup> | 2588                       | 1104             | 1105             | 1105             | 1105             |             | 2769                         | 1245             | 1246             | 1246             | 1246             |             |
| Median intake (g/day)               | 0                          | 2.2              | 5.3              | 9.1              | 16.9             |             | 0                            | 1.9              | 4.6              | 7.9              | 14.7             |             |
| Cases/person-years                  | 1048/21270                 | 413/14336        | 399/12390        | 380/11550        | 346/8907         |             | 978/21695                    | 433/16049        | 358/13865        | 320/13209        | 287/9764         |             |
| Model 1                             | 1 (ref)                    | 0.56(0.50, 0.63) | 0.64(0.57, 0.72) | 0.66(0.59, 0.74) | 0.80(0.71, 0.90) | 0.0012      | 1 (ref)                      | 0.57(0.51, 0.64) | 0.59(0.52, 0.67) | 0.58(0.51, 0.65) | 0.69(0.61, 0.79) | <.0001      |
| Model 2                             | 1 (ref)                    | 0.55(0.49, 0.62) | 0.63(0.56, 0.71) | 0.64(0.57, 0.72) | 0.74(0.65, 0.85) | 0.0002      | 1 (ref)                      | 0.59(0.52, 0.66) | 0.60(0.53, 0.68) | 0.59(0.51, 0.67) | 0.73(0.63, 0.84) | <.0001      |
| Model 3                             | 1 (ref)                    | 0.58(0.52, 0.66) | 0.66(0.59, 0.75) | 0.67(0.59, 0.77) | 0.76(0.66, 0.88) | 0.018       | 1 (ref)                      | 0.64(0.57, 0.73) | 0.67(0.59, 0.77) | 0.66(0.57, 0.76) | 0.83(0.71, 0.97) | 0.059       |

<sup>1</sup> Values are presented as HRs (95% CIs), calculated by using Cox proportional hazard analyses. Dietary intakes were calculated as the energy-adjusted cumulative average of baseline and follow-up data.

Tests for the linear trend of HRs were conducted by using the median value for each quintile of intake as a continuous variable.

<sup>2</sup> For white meat protein, because of the relatively low intake, people with a zero intake were set as the reference group, and the others were divided into four groups by quartiles.

Model 1: adjusted for baseline age, BMI and dietary intake of TE. Model 2: variables adjusted for in Model 1 + residential area, highest education level, household income level, PAL, smoking status, alcohol consumption, and SBP at baseline. Model 3: variables adjusted for in Model 2 + dietary intakes of plant protein, SFA, PUFA, dietary fiber, sodium, calcium and magnesium. Mutual adjustment was performed for red meat and white meat protein.

BMI, body mass index; CI, confidence interval; HR, hazard ratio; PAL, physical activity level; PUFA, polyunsaturated fat; SBP, systolic blood pressure; SFA, saturated fat; TE, total energy.

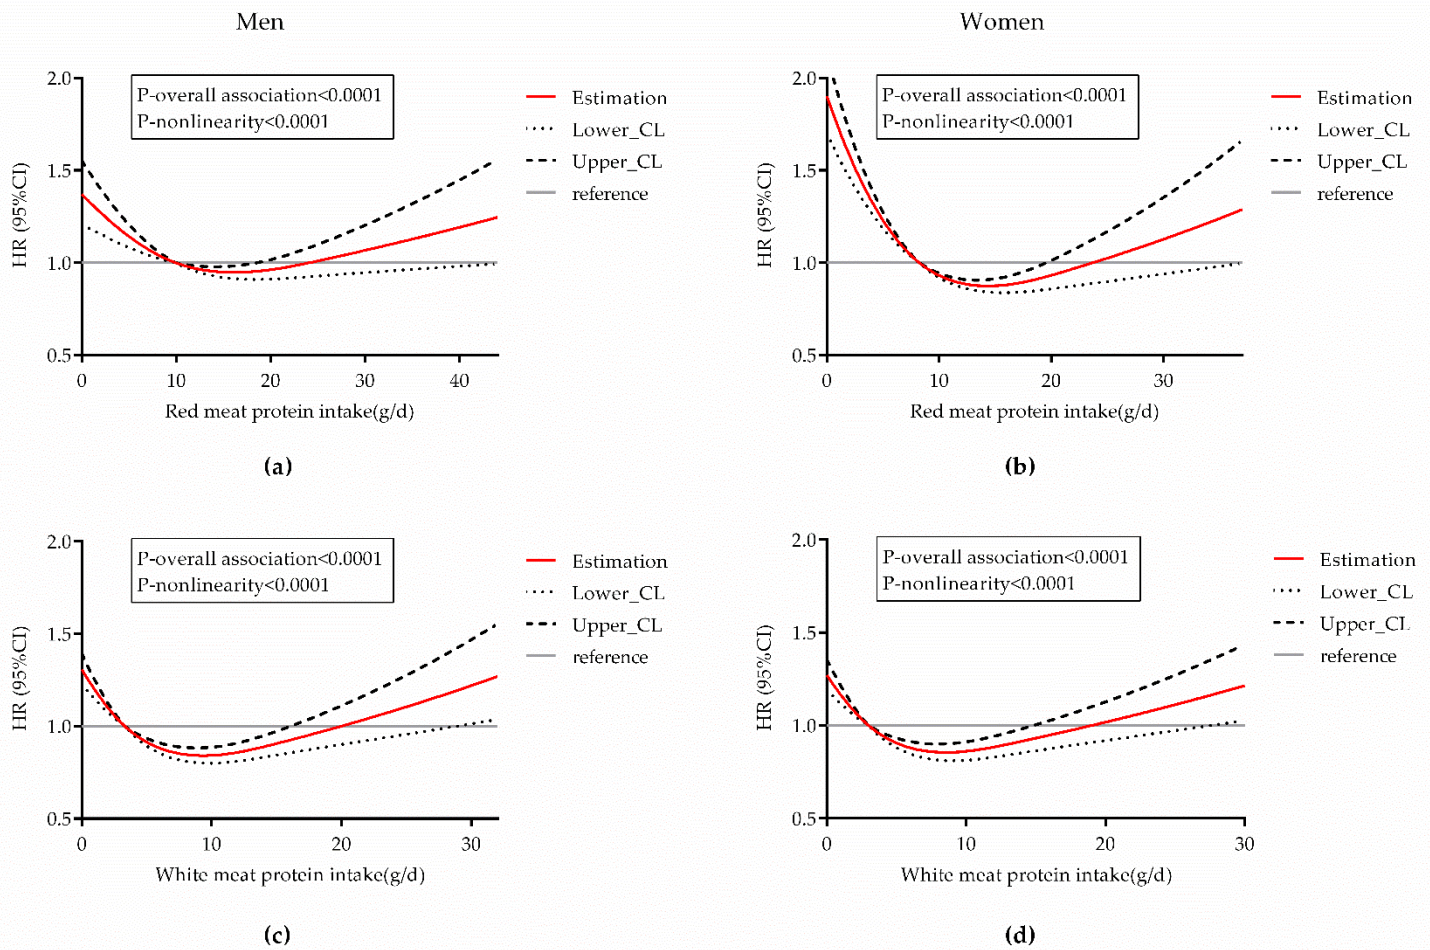

**Figure S1.** Multivariable-adjusted HRs and 95% CIs for the risk of HT according to dietary intakes of red meat and white meat protein on a continuous scale

CI, confidence interval; CL, confidence limit; HT, hypertension.

(a) Association between red meat protein intake and HT risk in men; (b) Association between red meat protein intake and HT risk in women; (c) Association between white meat protein intake and HT risk in men; (d) Association between white meat protein intake and HT risk in women. Red solid lines represent the multivariable-adjusted HRs, with black dotted lines representing the 95% CIs. Gray horizontal solid lines represent the references that were set at the median intakes, corresponding to an HR of 1.0. Analyses were adjusted for a series of variables according to Model 3.

**Table S2.** Stratified analyses of protein–hypertension association by BMI, age, smoking and alcohol drinking status in Chinese men and women<sup>1</sup>

| Quintiles of intake in males      |        |                 |                 |                 |                 |        |               |        |                 |                 |                 |                 | P for trend | Quintiles of intake in females |   |  |                                 |  |  |   |  |  |  |  |  |  | P for trend |  |  |  |  |  |  |
|-----------------------------------|--------|-----------------|-----------------|-----------------|-----------------|--------|---------------|--------|-----------------|-----------------|-----------------|-----------------|-------------|--------------------------------|---|--|---------------------------------|--|--|---|--|--|--|--|--|--|-------------|--|--|--|--|--|--|
| 1                                 |        |                 |                 |                 | 2               |        |               |        |                 | 3               |                 |                 |             |                                | 4 |  |                                 |  |  | 5 |  |  |  |  |  |  |             |  |  |  |  |  |  |
| Animal protein                    |        |                 |                 |                 |                 |        |               |        |                 |                 |                 |                 |             |                                |   |  |                                 |  |  |   |  |  |  |  |  |  |             |  |  |  |  |  |  |
| BMI<24kg/m² (n = 5609)            |        |                 |                 |                 |                 |        |               |        |                 |                 |                 |                 |             |                                |   |  | BMI<24kg/m² (n = 5937)          |  |  |   |  |  |  |  |  |  |             |  |  |  |  |  |  |
| HR (95%CI)                        | 1(ref) | 0.76(0.66,0.87) | 0.74(0.63,0.87) | 0.81(0.67,0.98) | 0.81(0.65,1.01) | 0.255  | HR (95%CI)    | 1(ref) | 0.78(0.67,0.90) | 0.74(0.62,0.89) | 0.71(0.58,0.87) | 0.70(0.55,0.91) | 0.0069      |                                |   |  |                                 |  |  |   |  |  |  |  |  |  |             |  |  |  |  |  |  |
| BMI≥24kg/m² (n = 1398)            |        |                 |                 |                 |                 |        |               |        |                 |                 |                 |                 |             |                                |   |  | BMI≥24kg/m² (n = 1815)          |  |  |   |  |  |  |  |  |  |             |  |  |  |  |  |  |
| HR (95%CI)                        | 1(ref) | 0.72(0.53,0.98) | 0.73(0.52,1.01) | 0.67(0.47,0.95) | 0.69(0.47,1.02) | 0.2271 | HR (95%CI)    | 1(ref) | 0.88(0.69,1.14) | 0.86(0.65,1.14) | 0.75(0.54,1.03) | 0.94(0.66,1.33) | 0.8233      |                                |   |  |                                 |  |  |   |  |  |  |  |  |  |             |  |  |  |  |  |  |
| P-interaction                     |        |                 |                 |                 |                 | 0.162  | P-interaction |        |                 |                 |                 |                 | 0.003       |                                |   |  |                                 |  |  |   |  |  |  |  |  |  |             |  |  |  |  |  |  |
| Age<50y (n = 5573)                |        |                 |                 |                 |                 |        |               |        |                 |                 |                 |                 |             |                                |   |  | Age<50y (n = 6124)              |  |  |   |  |  |  |  |  |  |             |  |  |  |  |  |  |
| HR (95%CI)                        | 1(ref) | 0.78(0.68,0.91) | 0.72(0.61,0.86) | 0.78(0.64,0.96) | 0.81(0.64,1.02) | 0.3125 | HR (95%CI)    | 1(ref) | 0.85(0.73,0.99) | 0.79(0.66,0.95) | 0.76(0.61,0.94) | 0.78(0.6,1.02)  | 0.0642      |                                |   |  |                                 |  |  |   |  |  |  |  |  |  |             |  |  |  |  |  |  |
| Age≥50y (n = 1434)                |        |                 |                 |                 |                 |        |               |        |                 |                 |                 |                 |             |                                |   |  | Age≥50y (n = 1628)              |  |  |   |  |  |  |  |  |  |             |  |  |  |  |  |  |
| HR (95%CI)                        | 1(ref) | 0.68(0.54,0.87) | 0.79(0.61,1.02) | 0.82(0.61,1.10) | 0.78(0.55,1.10) | 0.4954 | HR (95%CI)    | 1(ref) | 0.70(0.56,0.88) | 0.7(0.54,0.9)   | 0.61(0.46,0.81) | 0.75(0.54,1.04) | 0.1298      |                                |   |  |                                 |  |  |   |  |  |  |  |  |  |             |  |  |  |  |  |  |
| P-interaction                     |        |                 |                 |                 |                 | 0.443  | P-interaction |        |                 |                 |                 |                 | 0.749       |                                |   |  |                                 |  |  |   |  |  |  |  |  |  |             |  |  |  |  |  |  |
| Non-smoker (n = 2619)             |        |                 |                 |                 |                 |        |               |        |                 |                 |                 |                 |             |                                |   |  | Non-smoker (n = 7463)           |  |  |   |  |  |  |  |  |  |             |  |  |  |  |  |  |
| HR (95%CI)                        | 1(ref) | 0.88(0.70,1.11) | 0.74(0.57,0.96) | 0.81(0.60,1.07) | 0.85(0.61,1.18) | 0.4706 | HR (95%CI)    | 1(ref) | 0.81(0.71,0.92) | 0.75(0.65,0.88) | 0.69(0.58,0.83) | 0.75(0.61,0.92) | 0.0073      |                                |   |  |                                 |  |  |   |  |  |  |  |  |  |             |  |  |  |  |  |  |
| Former or current smoker (n=4388) |        |                 |                 |                 |                 |        |               |        |                 |                 |                 |                 |             |                                |   |  | Ever or current smoke (n = 289) |  |  |   |  |  |  |  |  |  |             |  |  |  |  |  |  |
| HR (95%CI)                        | 1(ref) | 0.71(0.61,0.82) | 0.73(0.61,0.87) | 0.77(0.63,0.94) | 0.76(0.60,0.96) | 0.2136 | HR (95%CI)    | 1(ref) | 0.60(0.35,1.03) | 0.67(0.37,1.22) | 0.67(0.32,1.42) | 1.03(0.42,2.51) | 0.9229      |                                |   |  |                                 |  |  |   |  |  |  |  |  |  |             |  |  |  |  |  |  |
| P-interaction                     |        |                 |                 |                 |                 | 0.746  | P-interaction |        |                 |                 |                 |                 | 0.511       |                                |   |  |                                 |  |  |   |  |  |  |  |  |  |             |  |  |  |  |  |  |
| Non-drinker (n = 2686)            |        |                 |                 |                 |                 |        |               |        |                 |                 |                 |                 |             |                                |   |  | Non-drinker (n = 6825)          |  |  |   |  |  |  |  |  |  |             |  |  |  |  |  |  |
| HR (95%CI)                        | 1(ref) | 0.76(0.61,0.94) | 0.78(0.60,1.00) | 0.78(0.58,1.03) | 0.80(0.57,1.11) | 0.3751 | HR (95%CI)    | 1(ref) | 0.80(0.70,0.92) | 0.73(0.62,0.85) | 0.67(0.56,0.81) | 0.74(0.6,0.92)  | 0.0064      |                                |   |  |                                 |  |  |   |  |  |  |  |  |  |             |  |  |  |  |  |  |
| Drinker (n = 4321)                |        |                 |                 |                 |                 |        |               |        |                 |                 |                 |                 |             |                                |   |  | Drinker (n = 927)               |  |  |   |  |  |  |  |  |  |             |  |  |  |  |  |  |
| HR (95%CI)                        | 1(ref) | 0.74(0.64,0.87) | 0.71(0.60,0.85) | 0.77(0.63,0.94) | 0.76(0.60,0.96) | 0.1672 | HR (95%CI)    | 1(ref) | 0.70(0.48,1.01) | 0.82(0.54,1.26) | 0.77(0.47,1.25) | 0.79(0.44,1.41) | 0.61        |                                |   |  |                                 |  |  |   |  |  |  |  |  |  |             |  |  |  |  |  |  |
| P-interaction                     |        |                 |                 |                 |                 | 0.796  | P-interaction |        |                 |                 |                 |                 | 0.857       |                                |   |  |                                 |  |  |   |  |  |  |  |  |  |             |  |  |  |  |  |  |
| Plant protein                     |        |                 |                 |                 |                 |        |               |        |                 |                 |                 |                 |             |                                |   |  |                                 |  |  |   |  |  |  |  |  |  |             |  |  |  |  |  |  |
| BMI<24kg/m² (n = 5609)            |        |                 |                 |                 |                 |        |               |        |                 |                 |                 |                 |             |                                |   |  | BMI<24kg/m² (n = 5937)          |  |  |   |  |  |  |  |  |  |             |  |  |  |  |  |  |
| HR (95%CI)                        | 1(ref) | 0.81(0.69,0.96) | 0.77(0.64,0.92) | 0.94(0.77,1.15) | 1.19(0.94,1.51) | 0.0088 | HR (95%CI)    | 1(ref) | 0.94(0.77,1.16) | 0.98(0.79,1.22) | 1.21(0.95,1.54) | 1.46(1.11,1.92) | <.0001      |                                |   |  |                                 |  |  |   |  |  |  |  |  |  |             |  |  |  |  |  |  |
| BMI≥24kg/m² (n = 1398)            |        |                 |                 |                 |                 |        |               |        |                 |                 |                 |                 |             |                                |   |  | BMI≥24kg/m² (n = 1815)          |  |  |   |  |  |  |  |  |  |             |  |  |  |  |  |  |
| HR (95%CI)                        | 1(ref) | 0.83(0.63,1.10) | 0.76(0.56,1.02) | 0.85(0.60,1.19) | 0.85(0.56,1.28) | 0.6172 | HR (95%CI)    | 1(ref) | 0.87(0.67,1.13) | 0.9(0.69,1.18)  | 0.92(0.68,1.24) | 1.2(0.85,1.69)  | 0.1773      |                                |   |  |                                 |  |  |   |  |  |  |  |  |  |             |  |  |  |  |  |  |

|                                             |        |                 |                 |                 |                 |        |                                            |        |                 |                 |                 |                  |        |
|---------------------------------------------|--------|-----------------|-----------------|-----------------|-----------------|--------|--------------------------------------------|--------|-----------------|-----------------|-----------------|------------------|--------|
| <i>P</i> -interaction                       |        |                 |                 |                 |                 | 0.379  | <i>P</i> -interaction                      |        |                 |                 |                 |                  | 0.608  |
| Age<50y ( <i>n</i> = 5573)                  |        |                 |                 |                 |                 |        | Age<50y ( <i>n</i> = 6124)                 |        |                 |                 |                 |                  |        |
| HR (95%CI)                                  | 1(ref) | 0.85(0.71,1.00) | 0.83(0.69,1.00) | 0.98(0.80,1.20) | 1.09(0.85,1.40) | 0.1009 | HR (95%CI)                                 | 1(ref) | 0.97(0.79,1.19) | 1.04(0.83,1.29) | 1.22(0.96,1.56) | 1.5(1.13,1.98)   | 0.0001 |
| Age≥50y ( <i>n</i> = 1434)                  |        |                 |                 |                 |                 |        | Age≥50y ( <i>n</i> = 1628)                 |        |                 |                 |                 |                  |        |
| HR (95%CI)                                  | 1(ref) | 0.85(0.66,1.09) | 0.66(0.50,0.87) | 0.85(0.63,1.14) | 1.23(0.86,1.76) | 0.148  | HR (95%CI)                                 | 1(ref) | 0.79(0.61,1.02) | 0.8(0.61,1.05)  | 0.95(0.71,1.27) | 1.13(0.81,1.58)  | 0.0964 |
| <i>P</i> -interaction                       |        |                 |                 |                 |                 | 0.560  | <i>P</i> -interaction                      |        |                 |                 |                 |                  | 0.128  |
| Non-smoker ( <i>n</i> = 2619)               |        |                 |                 |                 |                 |        | Non-smoker ( <i>n</i> = 7463)              |        |                 |                 |                 |                  |        |
| HR (95%CI)                                  | 1(ref) | 0.79(0.61,1.01) | 0.81(0.62,1.06) | 1.03(0.77,1.39) | 1.15(0.80,1.64) | 0.0884 | HR (95%CI)                                 | 1(ref) | 0.84(0.71,0.99) | 0.87(0.74,1.04) | 1.03(0.85,1.24) | 1.19(0.96,1.49)  | 0.003  |
| Former or current smoker ( <i>n</i> = 4388) |        |                 |                 |                 |                 |        | Ever or current smoke ( <i>n</i> = 289)    |        |                 |                 |                 |                  |        |
| HR (95%CI)                                  | 1(ref) | 0.84(0.71,1.00) | 0.76(0.63,0.92) | 0.89(0.72,1.09) | 1.10(0.86,1.41) | 0.1262 | HR (95%CI)                                 | 1(ref) | 2.95(1.10,7.90) | 3.33(1.15,9.61) | 2.81(0.97,8.17) | 6.12(1.94,19.38) | 0.0034 |
| <i>P</i> -interaction                       |        |                 |                 |                 |                 | 0.832  | <i>P</i> -interaction                      |        |                 |                 |                 |                  | 0.687  |
| Non-drinker ( <i>n</i> = 2686)              |        |                 |                 |                 |                 |        | Non-drinker ( <i>n</i> = 6825)             |        |                 |                 |                 |                  |        |
| HR (95%CI)                                  | 1(ref) | 0.67(0.52,0.86) | 0.52(0.39,0.68) | 0.68(0.50,0.93) | 0.78(0.54,1.11) | 0.8998 | HR (95%CI)                                 | 1(ref) | 0.88(0.74,1.04) | 0.96(0.8,1.15)  | 1.09(0.89,1.33) | 1.29(1.03,1.62)  | 0.0006 |
| Drinker ( <i>n</i> = 4321)                  |        |                 |                 |                 |                 |        | Drinker ( <i>n</i> = 927)                  |        |                 |                 |                 |                  |        |
| HR (95%CI)                                  | 1(ref) | 0.88(0.74,1.05) | 0.92(0.77,1.11) | 1.03(0.84,1.27) | 1.26(0.98,1.61) | 0.0129 | HR (95%CI)                                 | 1(ref) | 0.95(0.62,1.45) | 0.64(0.4,1.03)  | 0.96(0.57,1.62) | 1.36(0.74,2.49)  | 0.1303 |
| <i>P</i> -interaction                       |        |                 |                 |                 |                 | 0.392  | <i>P</i> -interaction                      |        |                 |                 |                 |                  | 0.601  |
| <b>Total protein</b>                        |        |                 |                 |                 |                 |        |                                            |        |                 |                 |                 |                  |        |
| BMI<24kg/m <sup>2</sup> ( <i>n</i> = 5609)  |        |                 |                 |                 |                 |        | BMI<24kg/m <sup>2</sup> ( <i>n</i> = 5937) |        |                 |                 |                 |                  |        |
| HR (95%CI)                                  | 1(ref) | 0.84(0.74,0.97) | 0.83(0.72,0.96) | 0.94(0.81,1.09) | 1.02(0.86,1.20) | 0.5939 | HR (95%CI)                                 | 1(ref) | 0.84(0.73,0.97) | 0.83(0.71,0.96) | 0.82(0.69,0.96) | 1(0.82,1.21)     | 0.5976 |
| BMI≥24kg/m <sup>2</sup> ( <i>n</i> = 1398)  |        |                 |                 |                 |                 |        | BMI≥24kg/m <sup>2</sup> ( <i>n</i> = 1815) |        |                 |                 |                 |                  |        |
| HR (95%CI)                                  | 1(ref) | 0.60(0.45,0.80) | 0.68(0.52,0.90) | 0.60(0.45,0.80) | 0.76(0.57,1.03) | 0.4336 | HR (95%CI)                                 | 1(ref) | 0.85(0.66,1.11) | 0.86(0.66,1.12) | 0.95(0.73,1.23) | 1.01(0.76,1.35)  | 0.5246 |
| <i>P</i> -interaction                       |        |                 |                 |                 |                 | 0.190  | <i>P</i> -interaction                      |        |                 |                 |                 |                  | 0.091  |
| Age<50y ( <i>n</i> = 5573)                  |        |                 |                 |                 |                 |        | Age<50y ( <i>n</i> = 6124)                 |        |                 |                 |                 |                  |        |
| HR (95%CI)                                  | 1(ref) | 0.81(0.70,0.94) | 0.80(0.69,0.93) | 0.87(0.74,1.01) | 0.96(0.81,1.15) | 0.9749 | HR (95%CI)                                 | 1(ref) | 0.86(0.73,1.00) | 0.86(0.73,1.01) | 0.89(0.76,1.06) | 1(0.81,1.23)     | 0.967  |
| Age≥50y ( <i>n</i> = 1434)                  |        |                 |                 |                 |                 |        | Age≥50y ( <i>n</i> = 1628)                 |        |                 |                 |                 |                  |        |
| HR (95%CI)                                  | 1(ref) | 0.80(0.64,1.01) | 0.89(0.70,1.13) | 0.88(0.69,1.12) | 1.05(0.80,1.37) | 0.5823 | HR (95%CI)                                 | 1(ref) | 0.84(0.68,1.03) | 0.77(0.62,0.97) | 0.75(0.59,0.96) | 0.96(0.74,1.24)  | 0.632  |
| <i>P</i> -interaction                       |        |                 |                 |                 |                 | 0.799  | <i>P</i> -interaction                      |        |                 |                 |                 |                  | 0.245  |
| Non-smoker ( <i>n</i> = 2619)               |        |                 |                 |                 |                 |        | Non-smoker ( <i>n</i> = 7463)              |        |                 |                 |                 |                  |        |
| HR (95%CI)                                  | 1(ref) | 0.87(0.70,1.09) | 0.83(0.66,1.05) | 0.98(0.78,1.23) | 1.04(0.81,1.35) | 0.4728 | HR (95%CI)                                 | 1(ref) | 0.84(0.74,0.95) | 0.81(0.71,0.93) | 0.84(0.73,0.96) | 0.94(0.8,1.11)   | 0.449  |
| Former or current smoker ( <i>n</i> = 4388) |        |                 |                 |                 |                 |        | Ever or current smoke ( <i>n</i> = 289)    |        |                 |                 |                 |                  |        |
| HR (95%CI)                                  | 1(ref) | 0.77(0.67,0.89) | 0.81(0.70,0.94) | 0.82(0.70,0.97) | 0.95(0.79,1.13) | 0.846  | HR (95%CI)                                 | 1(ref) | 1.00(0.57,1.78) | 1.09(0.58,2.03) | 0.88(0.44,1.73) | 1.51(0.77,2.98)  | 0.2964 |

|                                |        |                 |                 |                 |                 |        |                                |        |                 |                |                 |                 |        |
|--------------------------------|--------|-----------------|-----------------|-----------------|-----------------|--------|--------------------------------|--------|-----------------|----------------|-----------------|-----------------|--------|
| <i>P</i> -interaction          |        |                 |                 |                 |                 | 0.587  | <i>P</i> -interaction          |        |                 |                |                 |                 | 0.462  |
| Non-drinker ( <i>n</i> = 2686) |        |                 |                 |                 |                 |        | Non-drinker ( <i>n</i> = 6825) |        |                 |                |                 |                 |        |
| HR (95%CI)                     | 1(ref) | 0.85(0.69,1.05) | 0.85(0.68,1.06) | 0.90(0.72,1.13) | 0.93(0.72,1.21) | 0.7445 | HR (95%CI)                     | 1(ref) | 0.79(0.69,0.90) | 0.78(0.68,0.9) | 0.8(0.7,0.93)   | 0.93(0.78,1.1)  | 0.3991 |
| Drinker ( <i>n</i> = 4321)     |        |                 |                 |                 |                 |        | Drinker ( <i>n</i> = 927)      |        |                 |                |                 |                 |        |
| HR (95%CI)                     | 1(ref) | 0.77(0.66,0.90) | 0.80(0.68,0.93) | 0.85(0.72,0.99) | 0.97(0.82,1.16) | 0.7788 | HR (95%CI)                     | 1(ref) | 1.25(0.87,1.78) | 1.21(0.82,1.8) | 1.26(0.82,1.94) | 1.27(0.79,2.06) | 0.4132 |
| <i>P</i> -interaction          |        |                 |                 |                 |                 | 0.682  | <i>P</i> -interaction          |        |                 |                |                 |                 | 0.156  |

<sup>1</sup>All the analyses were multi-variable adjusted based on Model 3s as in Table 3.

BMI, body mass index; CI, confidence interval; HR, hazard ratio.
